# Supplementary material for: Hydrogels with protective effects against cellular oxidative stress via enzymatic crosslinking of feruloylated arabinoxylan from corn fibre
Source: Royal Society of Chemistry journal article supplement (doi:10.1039/d2gc03331c), 2022-01-01
Supplement: d2gc03331c1.pdf [file d2gc03331c1.pdf]

## **Hydrogels with protective effects against cellular oxidative stress via enzymatic crosslinking of feruloylated arabinoxylan from corn fibre**

Secil Yilmaz-Turan<sup>a</sup>, Kun Jiang<sup>a, b, c</sup>, Patricia Lopez-Sanchez<sup>d</sup>, Amparo-Jiménez-Quero<sup>a</sup>, Thomas Crouzier<sup>a, b, c</sup>, Tomás S. Plivelic<sup>e</sup>, Francisco Vilaplana<sup>a, \*</sup>

<sup>a</sup> *Division of Glycoscience, Department of Chemistry, School of Engineering Sciences in Chemistry, Biotechnology and Health, KTH Royal Institute of Technology, AlbaNova University Centre, SE-106 91, Stockholm, Sweden*

<sup>b</sup> *AIMES - Center for the Advancement of Integrated Medical and Engineering Sciences at Karolinska Institutet and KTH Royal Institute of Technology, Stockholm, Sweden*

<sup>c</sup> *Department of Neuroscience, Karolinska Institutet, SE-171 77, Stockholm, Sweden*

<sup>d</sup> *Division of Food and Nutrition Science, Biology and Biological Engineering, Chalmers University of Technology, SE-412 96, Gothenburg, Sweden*

<sup>e</sup> *MAX IV Laboratory, Lund University, PO box 118, 221 00 Lund, Sweden*

\* Corresponding author: Francisco Vilaplana ([franvila@kth.se](mailto:franvila@kth.se))

**Table S1.** Composition of feruloylated arabinoxylan extracted from corn bran by subcritical water

|                                                                 |              |
|-----------------------------------------------------------------|--------------|
| <b>Carbohydrate content (mg/g DW)<sup>a</sup></b>               | 999.3 ± 32.4 |
| <b>Ara (%)</b>                                                  | 22.1 ± 0.4   |
| <b>Xyl (%)</b>                                                  | 52.9 ± 0.1   |
| <b>Glc (%)</b>                                                  | 12.1 ± 0.5   |
| <b>Gal (%)</b>                                                  | 6.4 ± 0.0    |
| <b>Man (%)</b>                                                  | 1.1 ± 0.0    |
| <b>Rha (%)</b>                                                  | 0.7 ± 0.1    |
| <b>Fuc (%)</b>                                                  | 0.3 ± 0.0    |
| <b>GlcA (%)</b>                                                 | 3.1 ± 0.3    |
| <b>GalA (%)</b>                                                 | 1.3 ± 0.2    |
| <b>GAX (%)<sup>b</sup></b>                                      | 84.5 ± 0.8   |
| <b>Ara/Xyl<sup>c</sup></b>                                      | 0.4          |
| <b>Soluble protein content (%)<sup>d</sup></b>                  | 2.4 ± 0.2    |
| <b>Phenolic acid content (mg g<sup>-1</sup> DW)<sup>e</sup></b> | 47.1 ± 0.3   |
| <b><i>p</i>-coumaric acid (%)</b>                               | 4.2 ± 0.1    |
| <b>Ferulic acid (%)</b>                                         | 76.7 ± 0.3   |
| <b>Sinapic acid (%)</b>                                         | 2.5 ± 0.1    |
| <b>8-8' di-FA (%)</b>                                           | 1.6 ± 0.4    |
| <b>5-5' di-FA (%)</b>                                           | 5.6 ± 0.1    |
| <b>Putative di-FAs (%)<sup>f</sup></b>                          | 9.1 ± 0.6    |

<sup>a</sup> Carbohydrate content was determined by HPAEC-PAD after two-step methanolysis <sup>1</sup>;

<sup>b</sup> Glucuronoarabinoxylan (GAX) content was calculated based on the total of arabinose (Ara), xylose (Xyl), galactose (Gal) and glucuronic acid (GlcA) composition;

<sup>c</sup> Ara/Xyl is the ratio between arabinose and xylose;

<sup>d</sup> Soluble protein content was determined by the dye-binding Bradford assay <sup>2</sup>;

<sup>e</sup> Phenolic acid content was determined after saponification followed by HPLC analysis;

<sup>f</sup> The unknown di-FAs in HPLC chromatograms were combined as putative di-FAs and their amount was estimated using the response factor of 8-8' and 5-5' di-FAs.

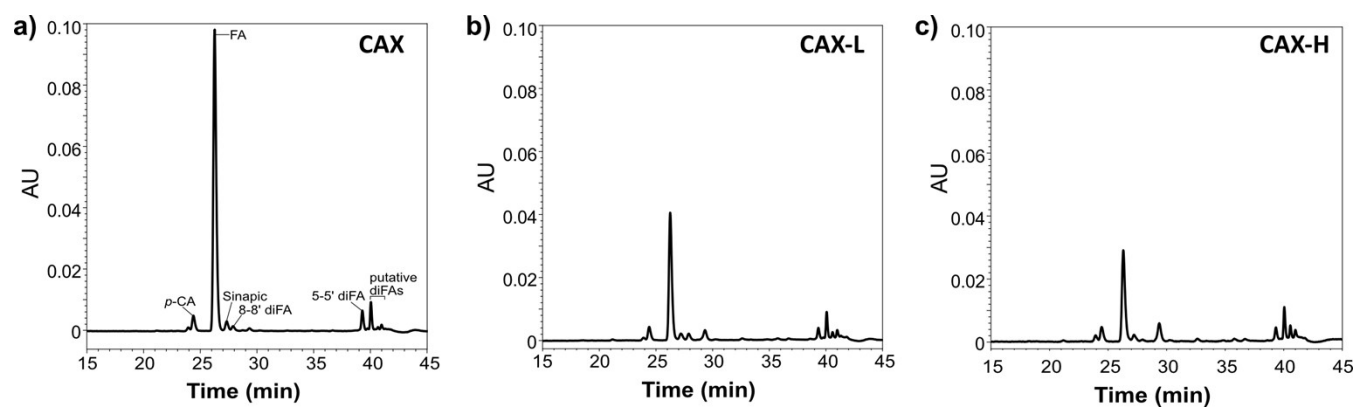

**Figure S1.** Phenolic acid profile of (a) the native (CAX), (b) laccase- crosslinked (CAX-L) and (c) HRP-crosslinked glucuronoarabinoxylan (CAX-H).

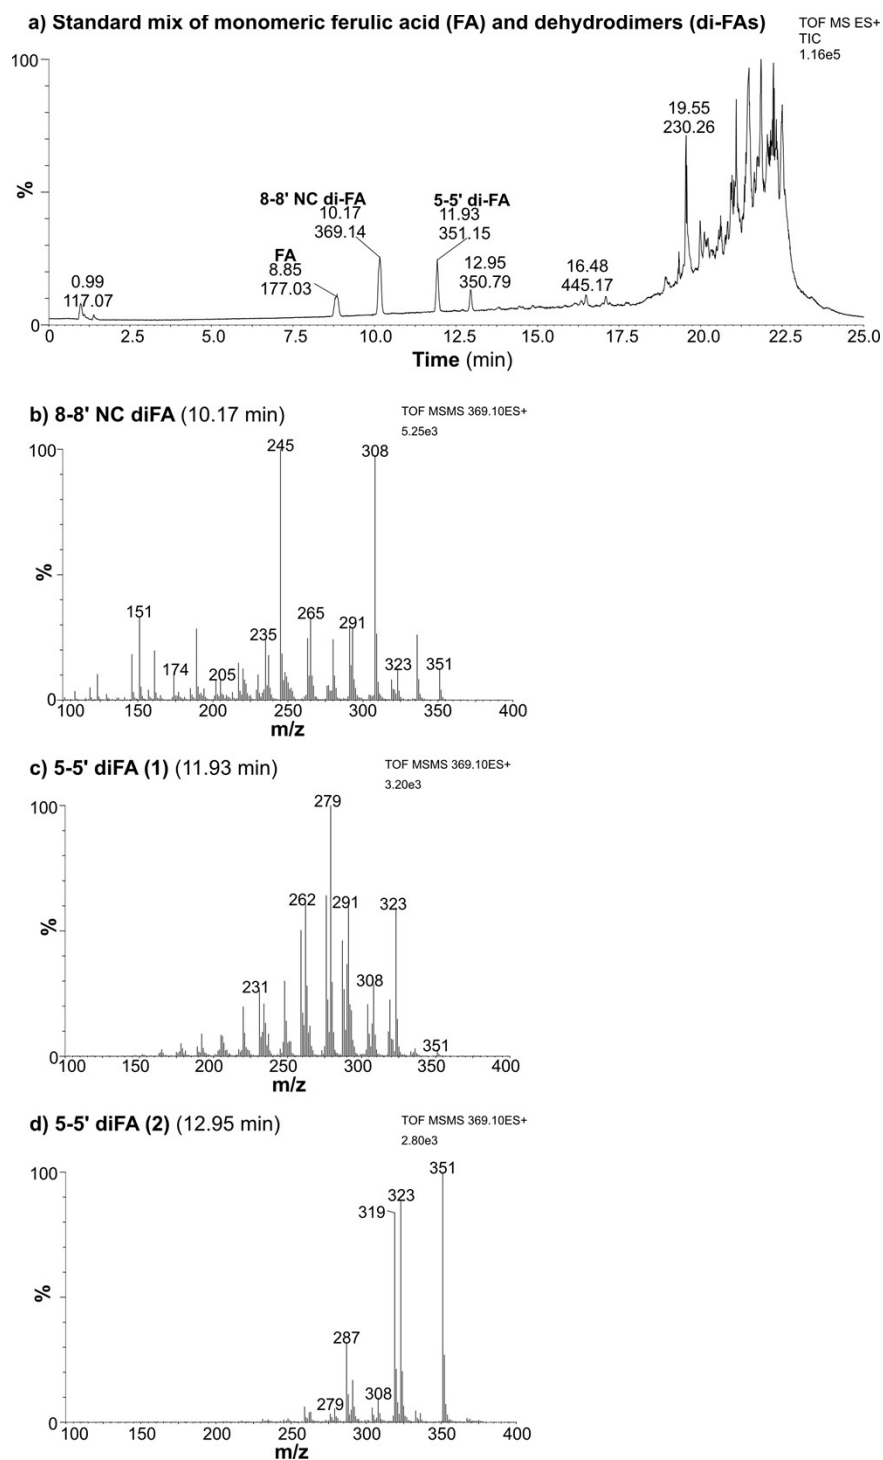

**Figure S2.** a) Ion extracted HPLC-ESI-MS chromatogram of ferulic acid standard mixture containing monomeric FA, 8-8' NC di-FA and 5-5' di-FA. CID-MS<sup>2</sup> spectra of (b) 8-8' NC di-FA standard, (c) 5-5' di-FA and (d) 5-5' di-FA isomer eluting at 12.95 min. Assignment of isomer-specific fragments was implemented according to <sup>3</sup>.

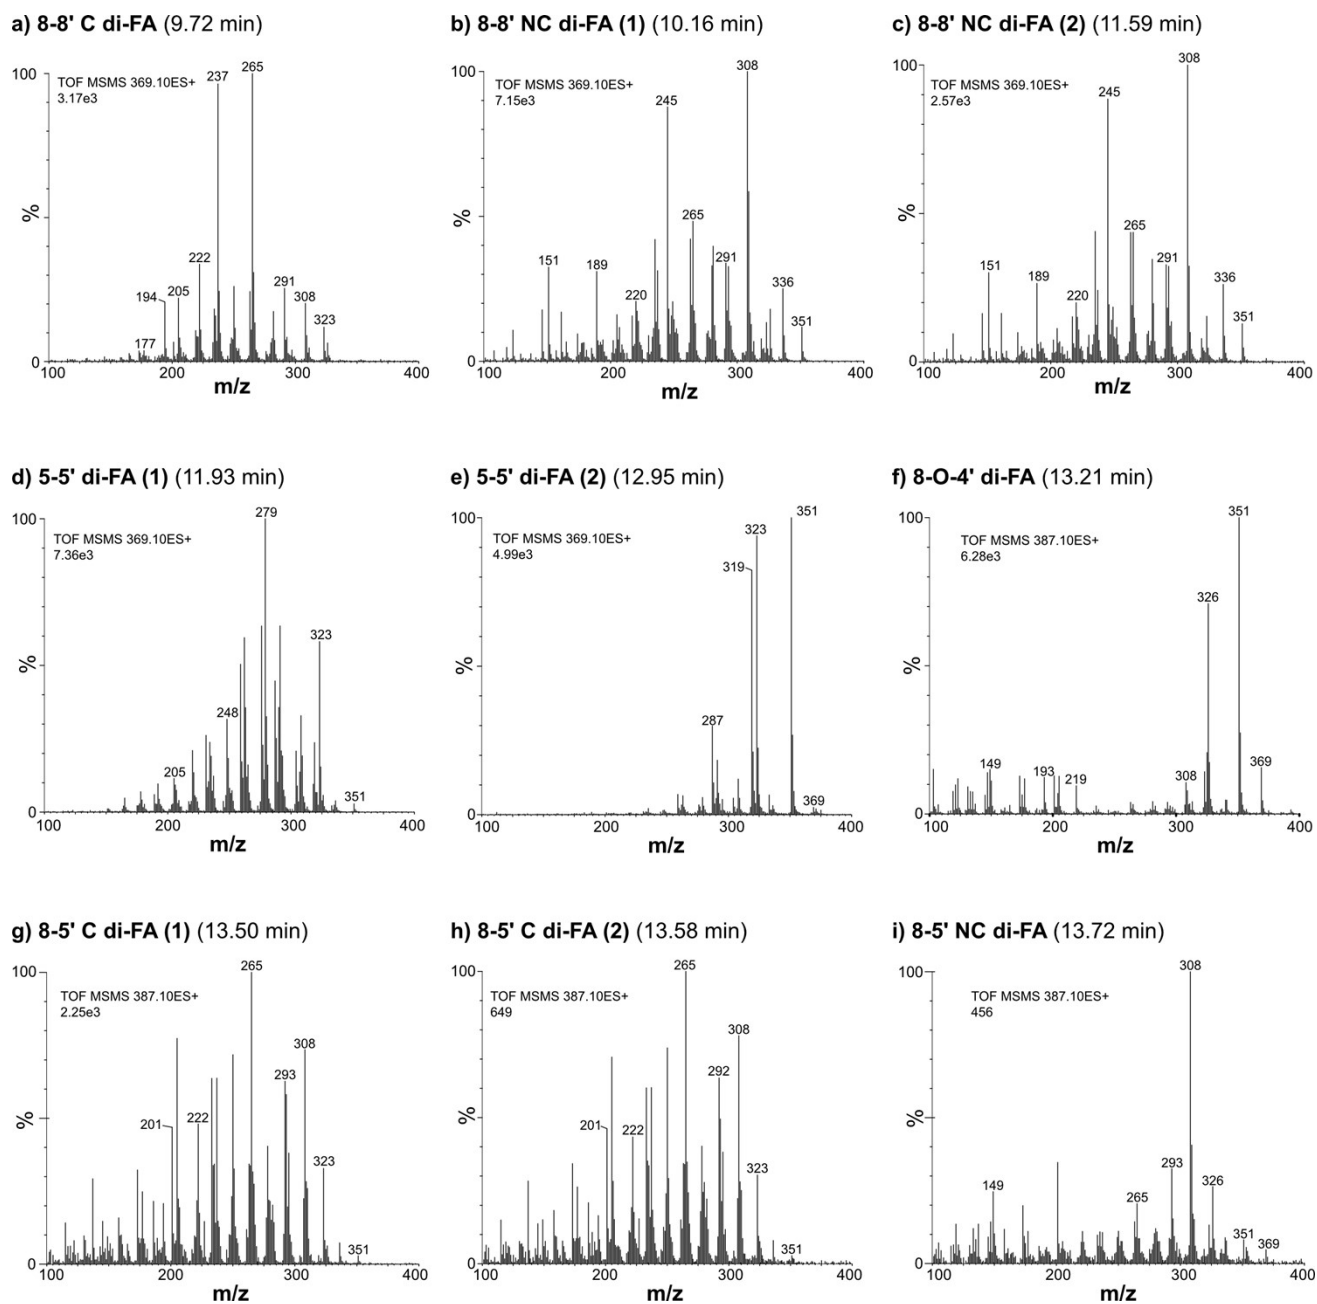

**Figure S3.** CID-MS<sup>2</sup> spectra of ferulic acid dehydrodimers (di-FAs) from native (CAX) and crosslinked (CAX-L and CAX-H) corn bran glucuronoarabinoxylan. Assignment of isomer-specific fragments was implemented according to <sup>3</sup>.

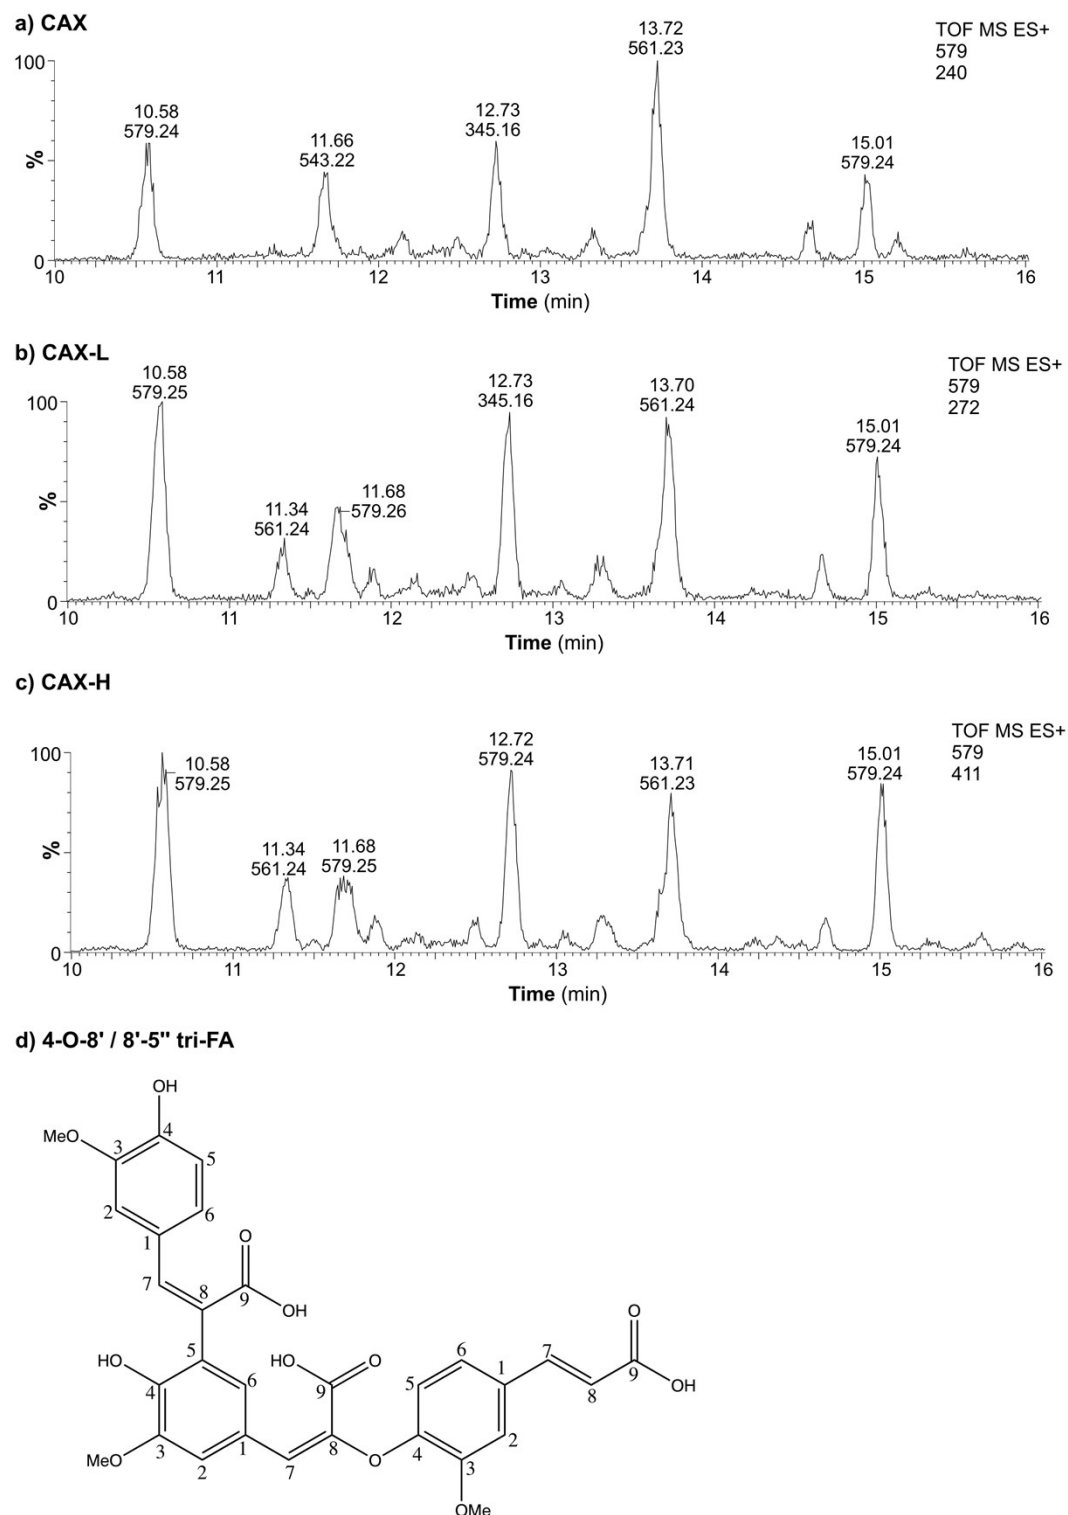

**Figure S4.** Ion extracted HPLC-ESI-MS chromatogram of ferulic acid dehydrotrimers (tri-FAs) in (a) CAX, (b) CAX-L and (c) CAX-H identified by the 579  $m/z$  ion, and (d) Chemical structure of a hypothetical tri-FA. Molecular mass of tri-FAs was determined according to <sup>4</sup>.

**a) SEC-MALLS at 1 mg/mL**

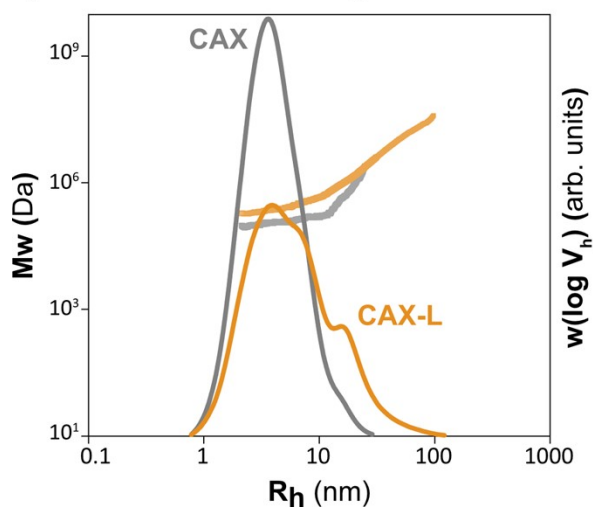

**b) SEC-MALLS at 2 mg/mL**

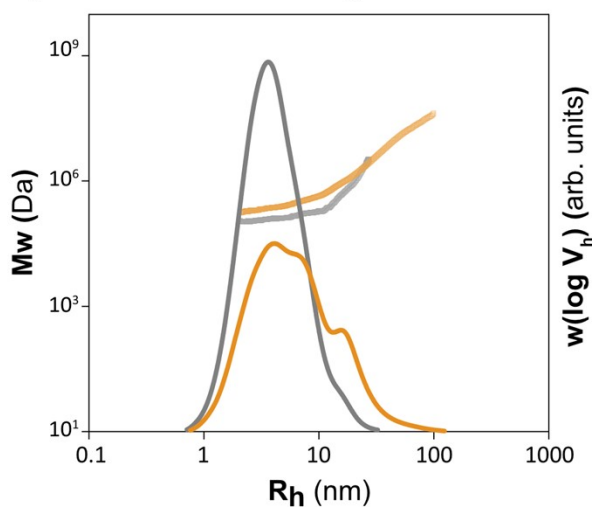

**Figure S5.** Molar mass distributions of CAX and CAX-L prepared at (a) 1 mg/mL and (b) 2 mg/mL

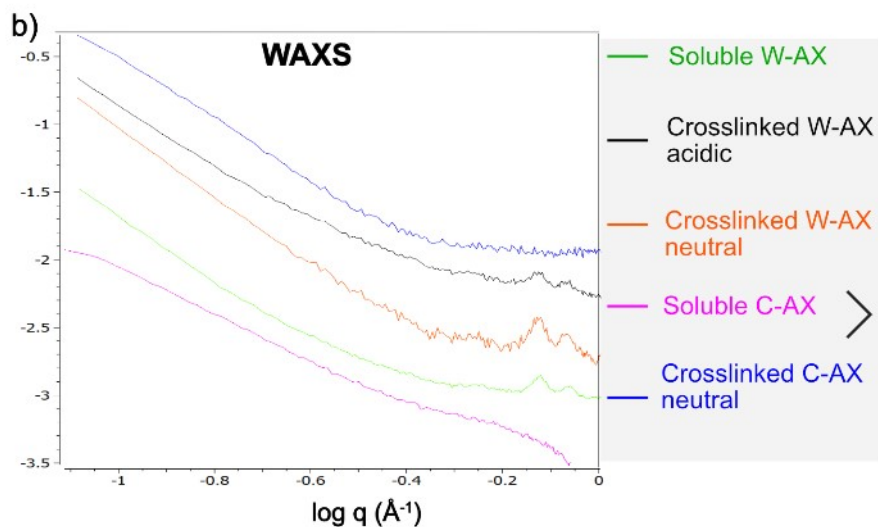

**Figure S6.** Wide-angle X-ray scattering profiles of soluble and crosslinked corn C-AX that reveal the absence of order (crystallinity) compared to similar soluble and crosslinked wheat W-AX (presented in our previous publication Yilmaz-Turan et al<sup>5</sup>).

## References

1. A. Martínez-Abad, N. Giummarella, M. Lawoko and F. Vilaplana, *Green Chemistry*, 2018, **20**, 2534-2546.
2. M. M. Bradford, *Anal Biochem*, 1976, **72**, 248-254.
3. R. Vismeh, F. Lu, S. P. Chundawat, J. F. Humpula, A. Azarpira, V. Balan, B. E. Dale, J. Ralph and A. D. Jones, *Analyst*, 2013, **138**, 6683-6692.
4. M. Bunzel, J. Ralph, C. Funk and H. Steinhart, *Tetrahedron Letters*, 2005, **46**, 5845-5850.
5. S. Yilmaz-Turan, P. Lopez-Sanchez, A. Jiménez-Quero, T. S. Plivelic and F. Vilaplana, *Food Hydrocolloids*, 2022, **128**, 107575.
